# Supplementary material for: Comparison of blood viscosity models in different degrees of carotid artery stenosis
Source: PeerJ. 2025 Apr 28;13:e19336. doi: 10.7717/peerj.19336 (PMC12045283; doi:10.7717/peerj.19336)
Supplement: Supplemental Information 1 [file peerj-13-19336-s001.xlsx]

## Sheet: Sheet1
ICA Stenosis Degree	Non-Newtonian Transient WSS	Newtonian Transient WSS	Non-Newtonian Transient TAWSS	Newtonian Transient TAWSS	Non-Newtonian Transient OSI	Newtonian Transient OSI	Non-Newtonian Transient RRT	Newtonian Transient RRT	Non-Newtonian Static WSS	Newtonian Static WSS
0	260	200	22.987	26.229	0.089	0.118	0.033	0.037	11000	160
0.12	280	260	16.987	16.863	0.026	0.018	0.031	0.032	15000	180
0.14	320	260	21.642	22.163	0.028	0.036	0.015	0.018	23000	550
0.16	400	300	28.655	32.302	0.436	0.438	0.022	0.031	50000	750
0.18	400	300	34.368	33.734	0.131	0.129	0.024	0.024	49000	1100
0.2	160	220	31.646	30.792	0.109	0.151	0.025	0.028	36000	800
0.22	450	600	29.523	25.395	0.049	0.025	0.046	0.039	55000	820
0.24	80	90	33.075	35.421	0.086	0.136	0.011	0.017	60000	850
0.26	300	360	35.059	35.111	0.167	0.169	0.036	0.056	20000	520
0.28	340	420	34.932	36.971	0.123	0.127	0.032	0.035	25000	340
0.29	500	550	32.341	35.331	0.029	0.047	0.034	0.035	31000	380
0.3	80	60	36.381	39.825	0.009	0.028	0.021	0.025	30000	420
0.34	260	200	31.311	48.195	0.022	0.047	0.025	0.036	8000	670
0.38	220	220	22.605	23.235	0.027	0.052	0.025	0.035	15000	530
0.42	320	280	23.635	25.469	0.128	0.066	0.034	0.035	170000	2400
0.46	120	130	25.289	45.253	0.296	0.336	0.038	0.056	30000	440
0.5	420	360	26.015	33.068	0.323	0.331	0.039	0.044	65000	1200
0.54	180	220	39.714	40.057	0.289	0.323	0.036	0.037	20000	270
0.58	200	150	24.565	35.857	0.336	0.373	0.041	0.047	22000	300
0.62	360	300	27.382	29.899	0.324	0.462	0.092	0.098	58000	400
0.66	200	120	30.761	38.672	0.179	0.218	0.076	0.079	24000	380
0.69	200	160	33.382	34.309	0.196	0.239	0.052	0.047	18000	440
0.7	220	200	35.678	48.182	0.204	0.241	0.058	0.069	33000	480
0.72	120	120	45.159	52.897	0.339	0.362	0.065	0.111	30000	420
0.74	100	110	44.084	52.631	0.331	0.349	0.023	0.027	32000	440
0.76	120	105	44.627	45.061	0.375	0.408	0.058	0.061	30000	380
0.78	200	180	47.138	58.074	0.376	0.455	0.025	0.042	18000	480
0.8	110	100	48.867	60.319	0.381	0.443	0.015	0.018	20000	280
0.82	250	230	52.194	62.042	0.434	0.476	0.097	0.162	23000	510
0.84	280	300	55.152	68.856	0.435	0.479	0.144	0.145	160000	22000
0.86	200	130	60.628	72.906	0.276	0.443	0.022	0.025	19000	390
0.88	140	150	71.118	78.991	0.307	0.329	0.008	0.005	50000	700
0.9	120	190	66.764	73.788	0.216	0.313	0.031	0.169	29000	490
